# Supplementary material for: Transcriptomic profiling of nematode parasites surviving vaccine exposure
Source: PubMed Central journal article supplement (PMC5909036; doi:10.1016/j.ijpara.2018.01.004), 2018-04

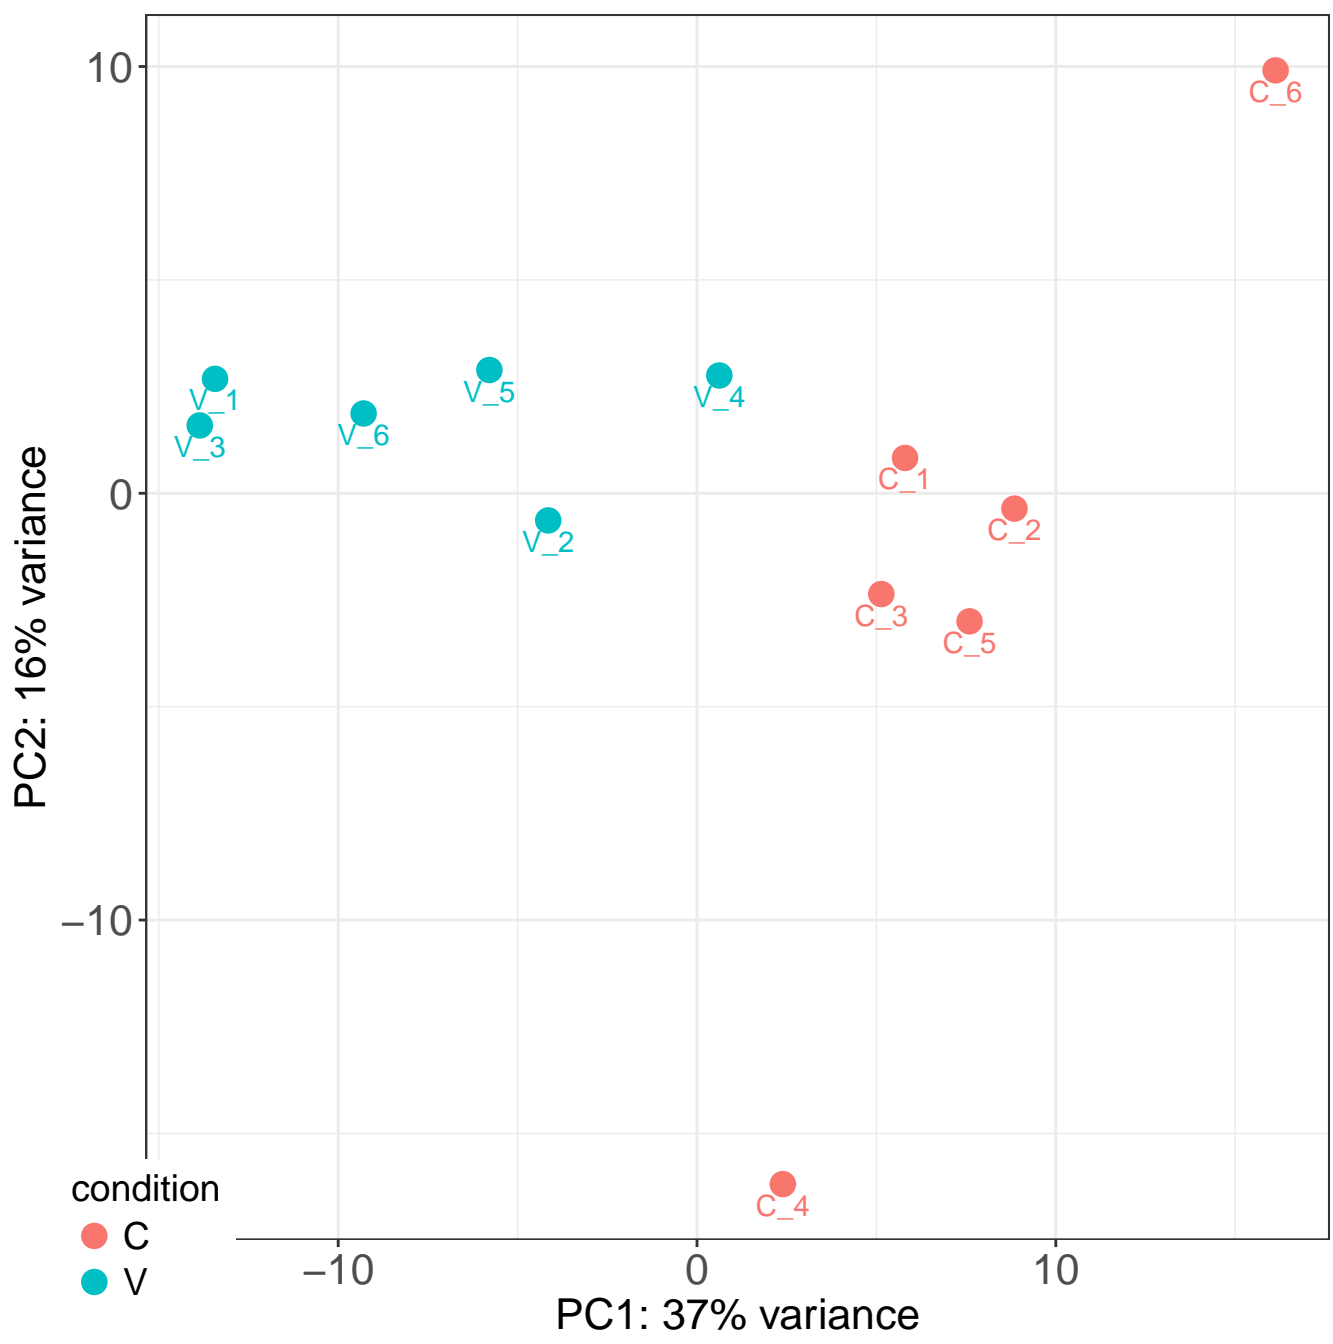

Supplement: mmc1.pdf [file mmc1.pdf]
