# Supplementary material for: Transcriptomic profiling of nematode parasites surviving vaccine exposure
Source: PubMed Central journal article supplement (PMC5909036; doi:10.1016/j.ijpara.2018.01.004), 2018-04

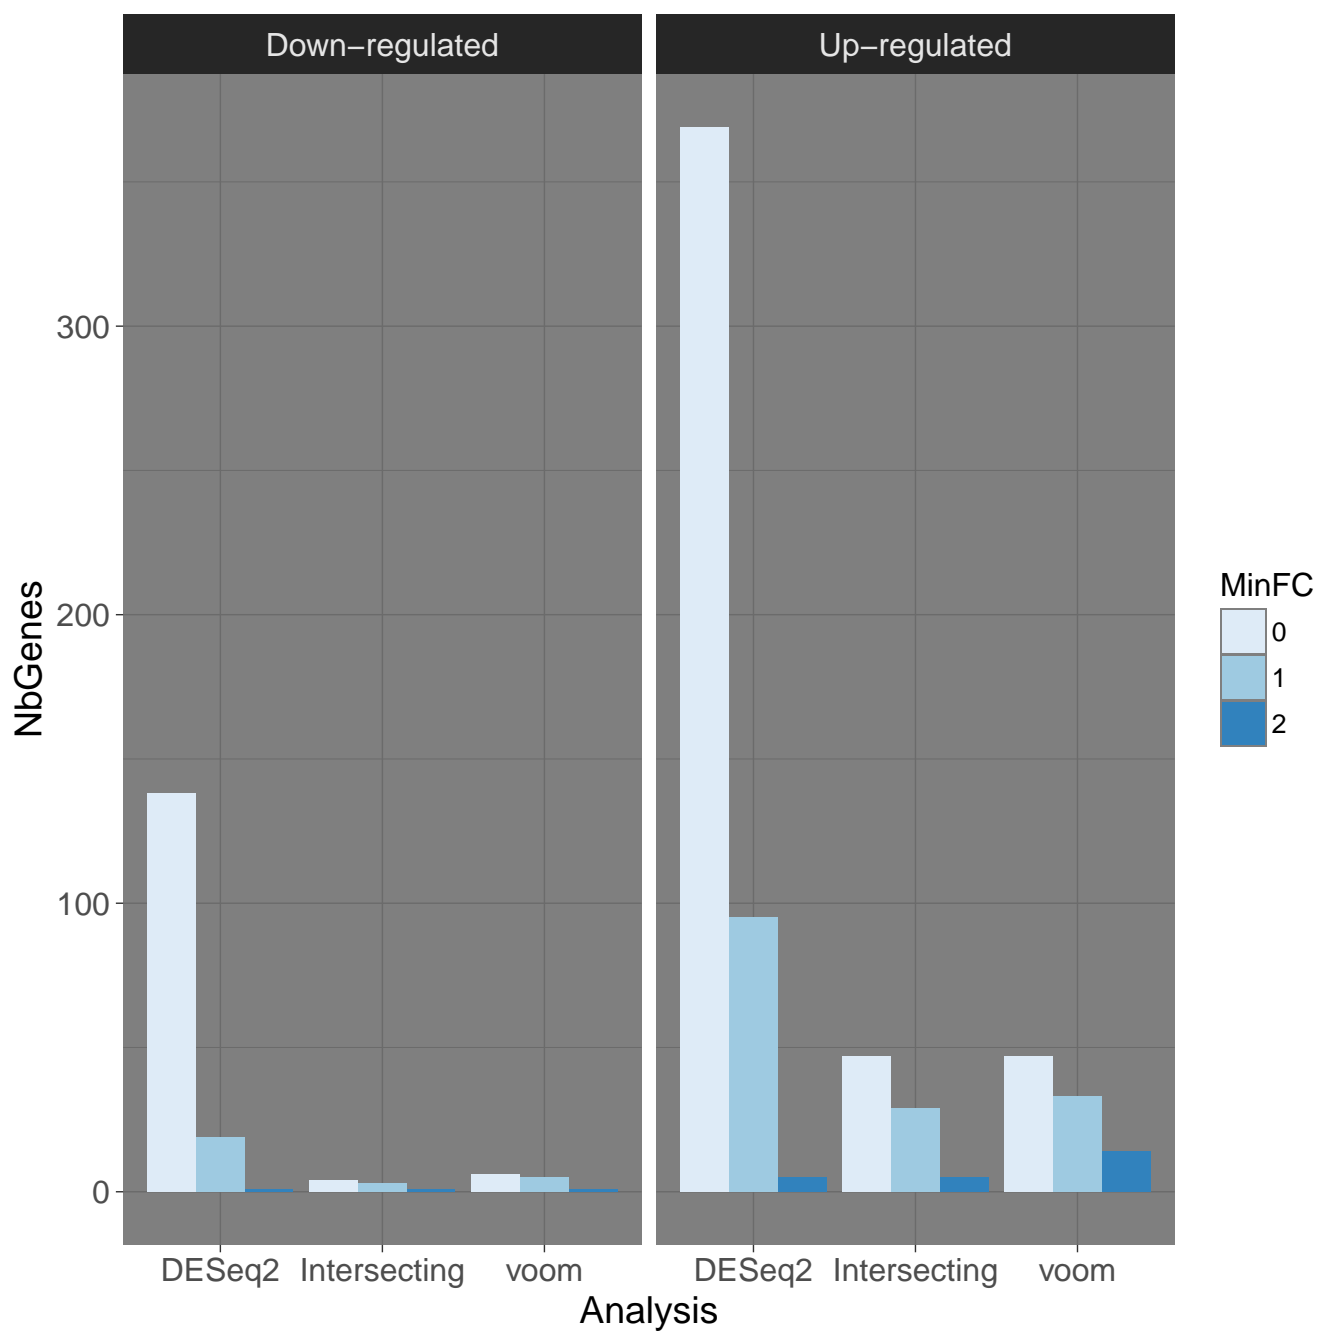

Supplement: mmc2.pdf [file mmc2.pdf]
